# Supplementary material for: A novel fluorescent off–on probe for the sensitive and selective detection of fluoride ions
Source: Royal Society of Chemistry journal article supplement (doi:10.1039/c9ra06342k), 2019-01-01
Supplement: c9ra06342k1.pdf [file c9ra06342k1.pdf]

## Electronic Supplementary Information for

### A novel fluorescence off-on probe for the sensitive and selective detection of fluoride ions

Lihong Li,<sup>\*ab</sup> Min Zhang,<sup>a</sup> Kaijing Chang,<sup>b</sup> Yu Kang,<sup>a</sup> Guodong Ren,<sup>a</sup> Xiaoyu Hou,<sup>a</sup> Wen Liu,<sup>b</sup>  
Haojiang Wang,<sup>b</sup> Bin Wang<sup>b</sup> and Haipeng Diao<sup>\*ab</sup>

<sup>a</sup>*Department of Biochemistry and Molecular Biology, Shanxi Medical University, Taiyuan 030001, PR China*

<sup>b</sup>*School of Basic Medical Sciences, Shanxi Medical University, Taiyuan 030001, PR China*

*E-mail: lilh@sxmu.edu.cn, diaohp@sxmu.edu.cn*

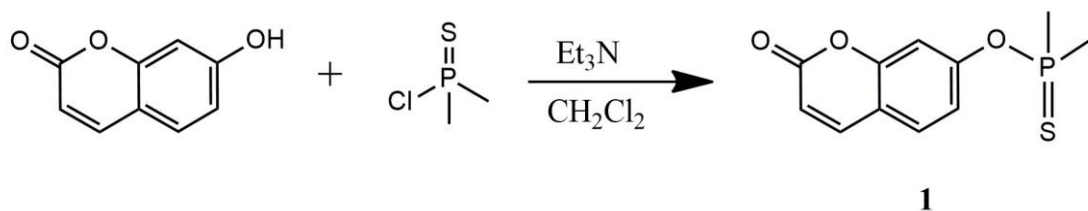

**Scheme S1.** Synthetic route of probe 1.

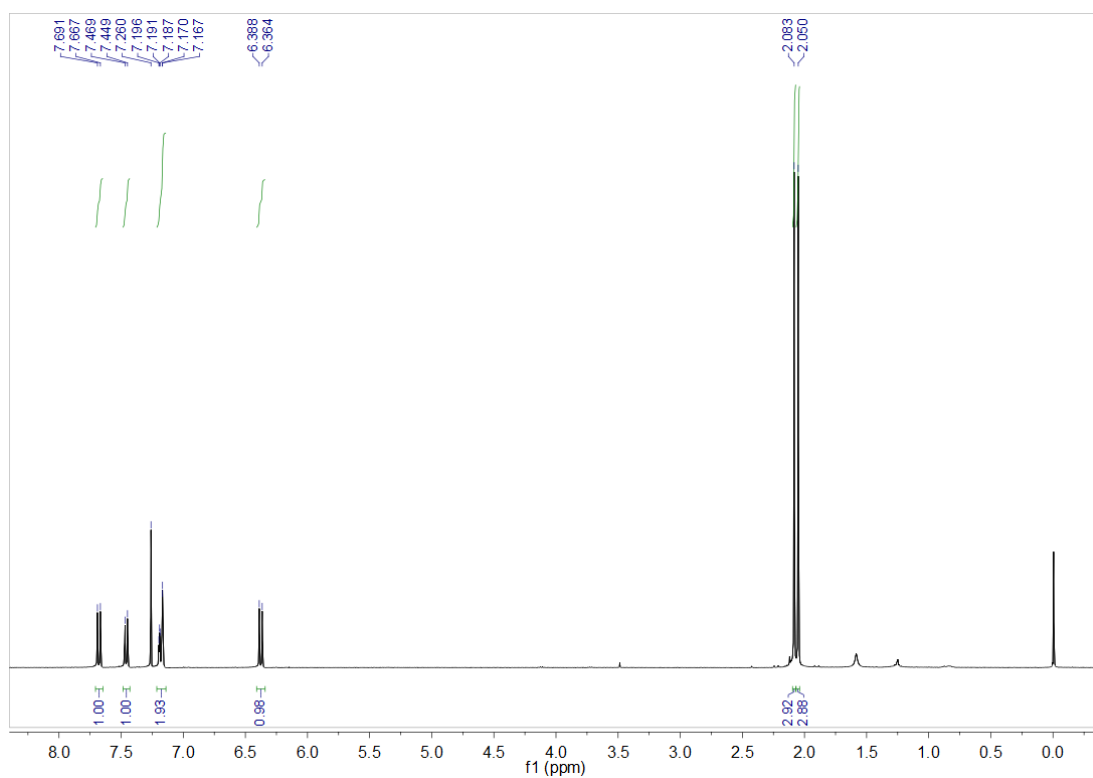

**Fig. S1.**  $^1\text{H}$  NMR spectrum of probe **1** (400 MHz, 298 K,  $\text{CDCl}_3$ ).

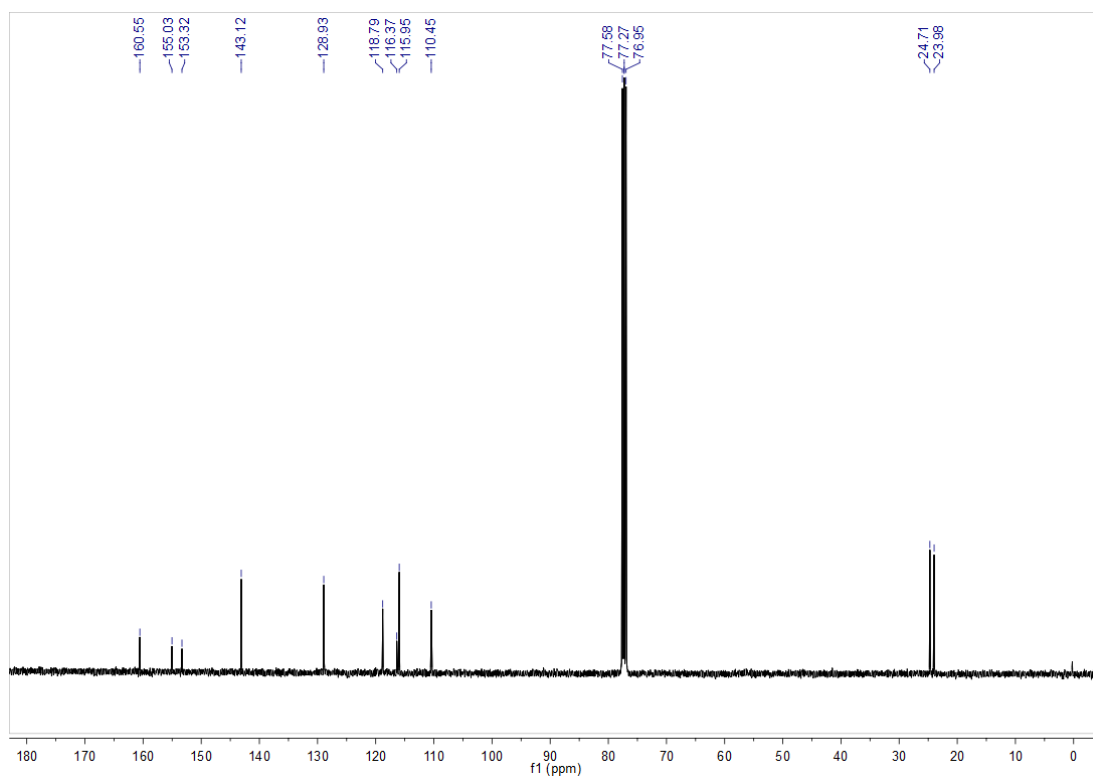

**Fig. S2.**  $^{13}\text{C}$  NMR spectrum of probe **1** (100 MHz, 298 K,  $\text{CDCl}_3$ ).

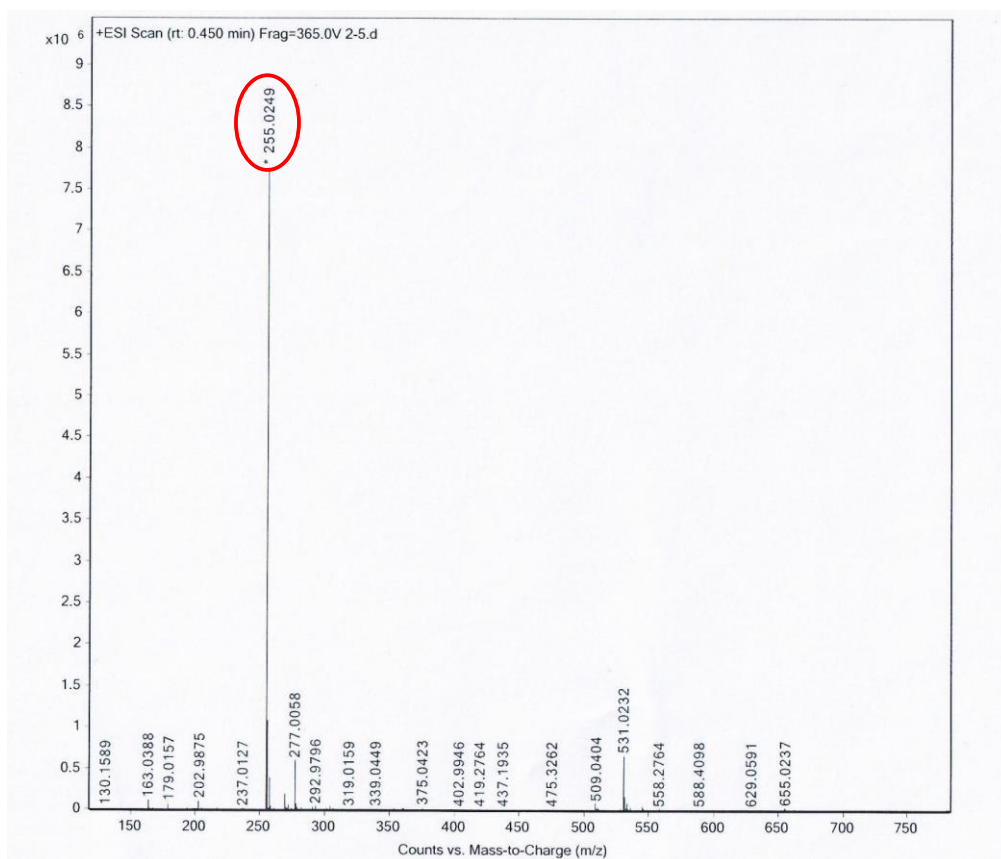

**Fig. S3.** High resolution ESI-MS of probe 1.

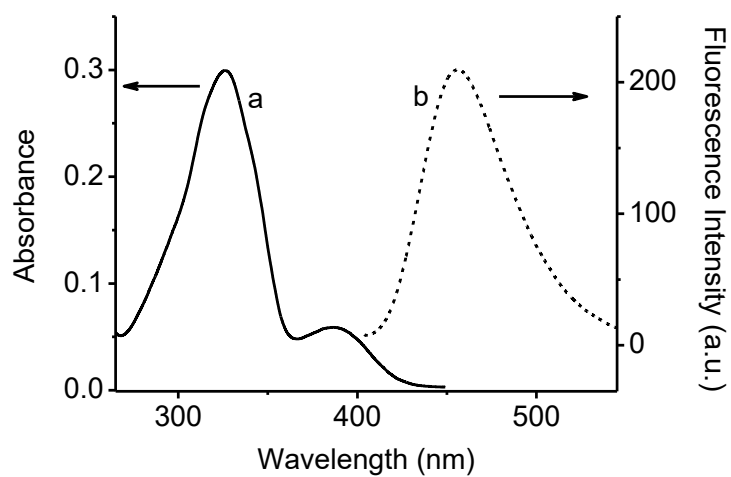

**Fig. S4.** Absorption and fluorescence emission spectra of coumarin (10  $\mu$ M) in a mixture of DMSO and Tris buffer solution (pH 8.0).

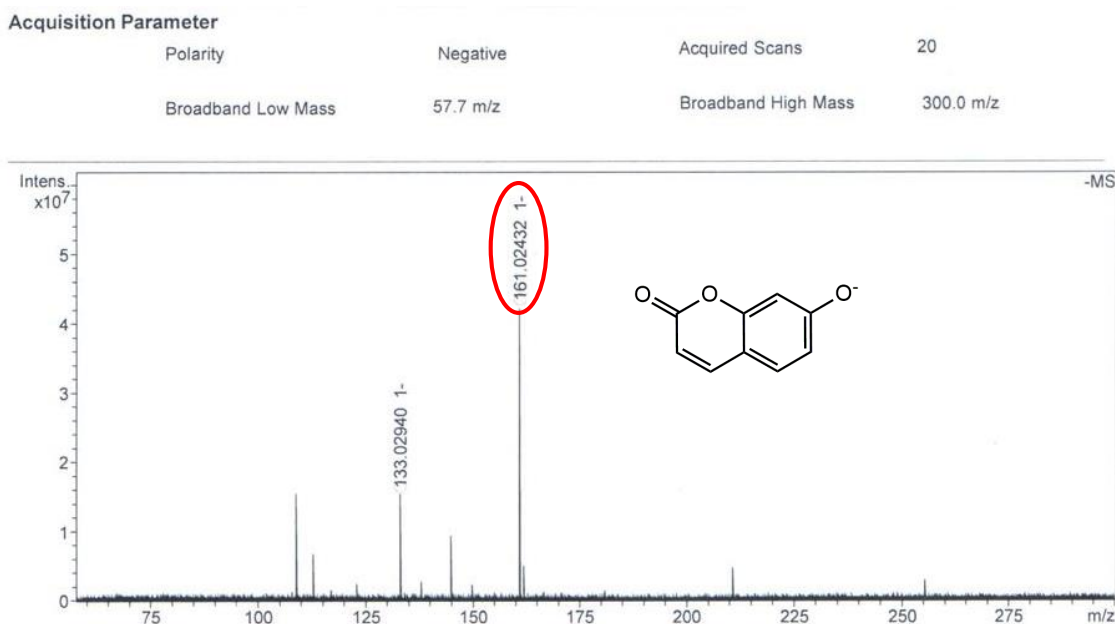

**Fig. S5.** High resolution ESI-MS of the reaction solution of probe **1** (50  $\mu\text{M}$ ) with  $\text{F}^-$  (500  $\mu\text{M}$ ). The peak at  $m/z = 161.0243$  reflects the formation of the fluorophore coumarin.

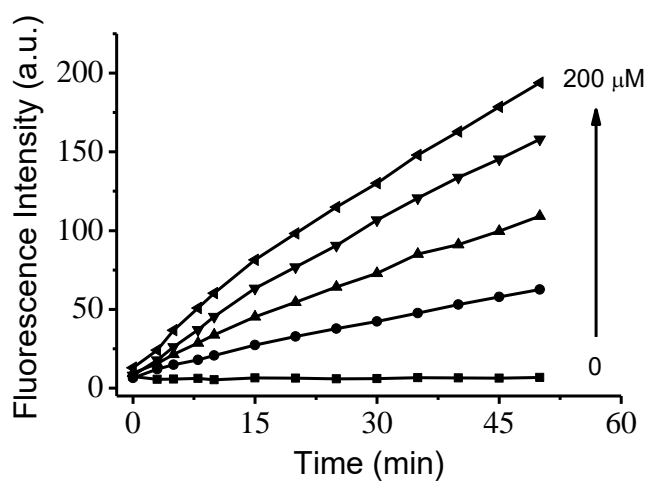

**Fig. S6.** Plots of fluorescence intensity vs. the reaction time of probe **1** (10  $\mu\text{M}$ ) with varied concentrations of  $\text{F}^-$  (0-200  $\mu\text{M}$ ). The measurements were performed in a mixture of DMSO and Tris buffer solution (pH 8.0) at room temperature.  $\lambda_{\text{ex/em}} = 385/455$  nm.

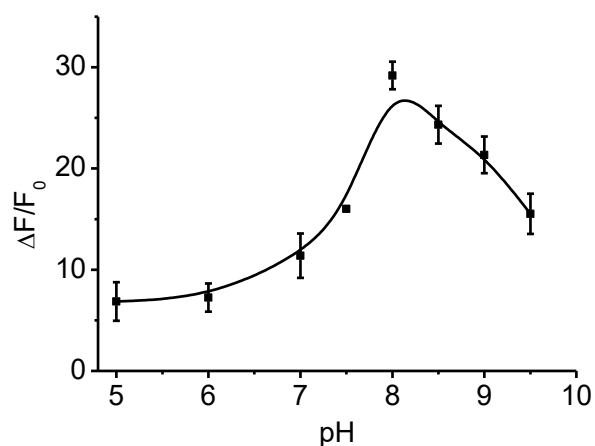

**Fig. S7.** Effect of pH on the fluorescence ( $\lambda_{\text{ex/em}} = 385/455$  nm) of probe **1** (10  $\mu\text{M}$ ) reacting with  $\text{F}^-$  (200  $\mu\text{M}$ ). The results are the mean  $\pm$  standard deviation (SD) of three separate measurements.

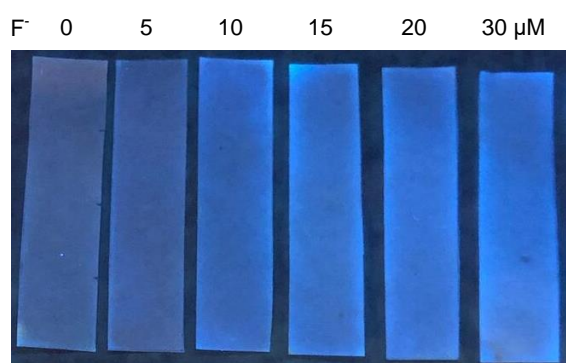

**Fig. S8.** Fluorescence images of test strips for detecting  $\text{F}^-$  in aqueous solution with varied  $\text{F}^-$  concentrations (0, 5, 10, 15, 20, and 30  $\mu\text{M}$ ). The test strips were excited at 365 nm by a hand-held UV lamp.

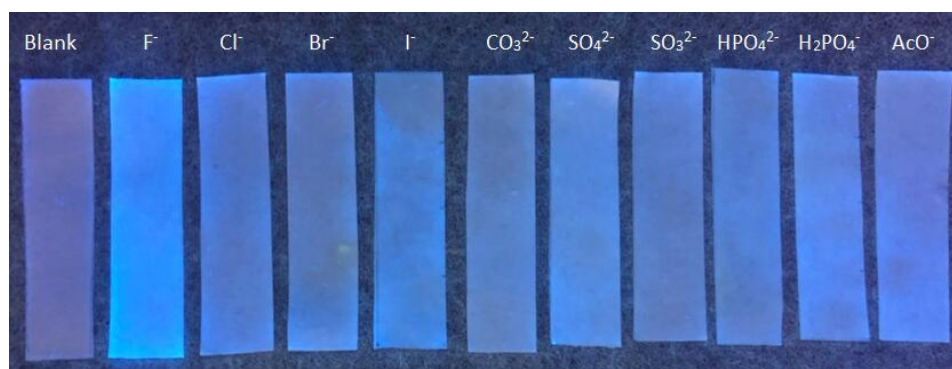

**Fig. S9.** Fluorescence images of test strips in the presence of various anions (200  $\mu\text{M}$ ). The test papers were excited at 365 nm by a hand-held UV lamp.

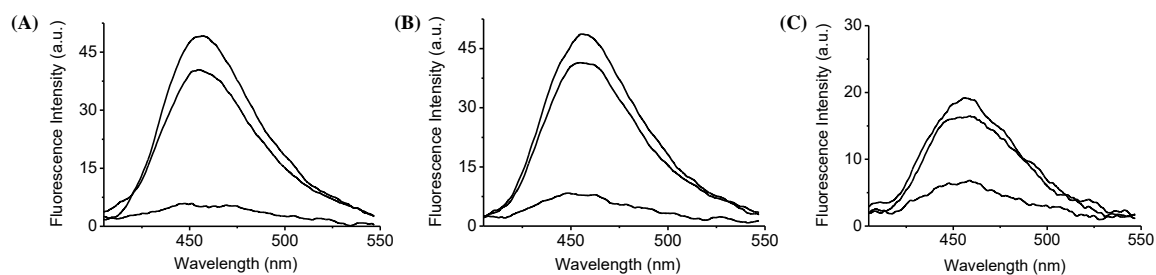

**Fig. S10.** Fluorescence response of probe **1** (10  $\mu\text{M}$ ) to  $\text{F}^-$  in real samples. (A) Tap water: samples No. 1-3 from bottom to up; (B) Yingze Lake water: samples No. 1-3 from bottom to up; (C) Toothpaste: samples No. 1-3 from up to bottom.  $\lambda_{\text{ex/em}} = 385/455 \text{ nm}$ .

**Table S1.** Comparison of probe **1** with other recently reported fluorescent probes for  $\text{F}^-$

| Mechanism                   | Detection limit    | Wavelength                             | Detection media                                 | Literature                                                                  |
|-----------------------------|--------------------|----------------------------------------|-------------------------------------------------|-----------------------------------------------------------------------------|
| P-O cleavage                | 0.29 $\mu\text{M}$ | $\lambda_{\text{em}} = 455 \text{ nm}$ | DMSO/Tris buffer (7:3, v/v)                     | This work                                                                   |
| H-bond interaction          | Not mentioned      | $\lambda_{\text{em}} = 495 \text{ nm}$ | $\text{CH}_3\text{CN}$                          | Zhou <i>et al.</i> , <i>Spectrochim. Acta A</i> , 2018, <b>204</b> , 777    |
| H-bond interaction          | 3.2 $\mu\text{M}$  | $\lambda_{\text{em}} = 510 \text{ nm}$ | toluene                                         | Lu <i>et al.</i> , <i>Sens. Actuators B</i> , 2018, <b>270</b> , 291        |
| Deprotonation of N-H proton | 0.28 $\mu\text{M}$ | $\lambda_{\text{em}} = 598 \text{ nm}$ | DMSO                                            | Yang <i>et al.</i> , <i>Sens. Actuators B</i> , 2015, <b>210</b> , 784      |
| Si-O cleavage               | 0.59 $\mu\text{M}$ | $\lambda_{\text{em}} = 564 \text{ nm}$ | $\text{CH}_3\text{CN}$ /HEPES buffer (8:2, v/v) | Yoo <i>et al.</i> , <i>RSC Adv.</i> , 2016, <b>6</b> , 19910                |
| Si-O cleavage               | 3.5 $\mu\text{M}$  | $\lambda_{\text{em}} = 480 \text{ nm}$ | ethanol                                         | Zhang <i>et al.</i> , <i>Anal. Bioanal. Chem.</i> , 2017, <b>409</b> , 2075 |
| Si-O cleavage               | 1.03 $\mu\text{M}$ | $\lambda_{\text{em}} = 523 \text{ nm}$ | DMSO                                            | Roy <i>et al.</i> , <i>Chem. Commun.</i> , 2014, <b>50</b> , 5510           |
| Si-O cleavage               | 0.17 $\mu\text{M}$ | $\lambda_{\text{em}} = 485 \text{ nm}$ | $\text{CH}_3\text{CN}$                          | Zhang <i>et al.</i> , <i>Chem. Commun.</i> , 2014, <b>50</b> , 14021        |

|               |               |                                 |                                                                      |                                                                       |
|---------------|---------------|---------------------------------|----------------------------------------------------------------------|-----------------------------------------------------------------------|
| Si-O cleavage | Not mentioned | $\lambda_{em} = 589 \text{ nm}$ | CH <sub>3</sub> CN/H <sub>2</sub> O (1:1, v/v) or CH <sub>3</sub> CN | Kim <i>et al.</i> , <i>Org. Lett.</i> , 2007, <b>9</b> , 3109         |
| Si-O cleavage | 85 nM         | $\lambda_{em} = 718 \text{ nm}$ | DMSO/H <sub>2</sub> O (95:5, v/v)                                    | Cao <i>et al.</i> , <i>Tetrahedron Lett.</i> , 2012, <b>53</b> , 2107 |
| Si-O cleavage | 0.1 $\mu$ M   | $\lambda_{em} = 682 \text{ nm}$ | CH <sub>3</sub> CN                                                   | Xie <i>et al.</i> , <i>J. Fluoresc.</i> , 2016, <b>26</b> , 1737      |
| Si-O cleavage | 0.12 $\mu$ M  | $\lambda_{em} = 676 \text{ nm}$ | CH <sub>2</sub> Cl <sub>2</sub>                                      | Cao <i>et al.</i> , <i>RSC Adv.</i> , 2012, <b>2</b> , 418            |
| Si-O cleavage | 17.2 $\mu$ M  | $\lambda_{em} = 493 \text{ nm}$ | DMF/HEPES buffer (7:3, v/v)                                          | Zhou <i>et al.</i> , <i>Dyes Pigments</i> , 2018, <b>158</b> , 277    |
| P-O cleavage  | 9.8 nM        | $\lambda_{em} = 536 \text{ nm}$ | DMSO/Tris buffer (7:3, v/v)                                          | Kim <i>et al.</i> , <i>Dyes Pigments</i> , 2015, <b>112</b> , 170     |
| P-O cleavage  | 48 nM         | $\lambda_{em} = 669 \text{ nm}$ | DMSO/Tris buffer (7:3, v/v)                                          | Du <i>et al.</i> , <i>Anal. Chim. Acta</i> , 2018, <b>1030</b> , 172. |

---
